# Supplementary figures and images for: Distinct Distal Gut Microbiome Diversity and Composition in Healthy Children from Bangladesh and the United States
Source: PLOS journal article supplement (doi:10.1371/journal.pone.0053838), 2013-01-22

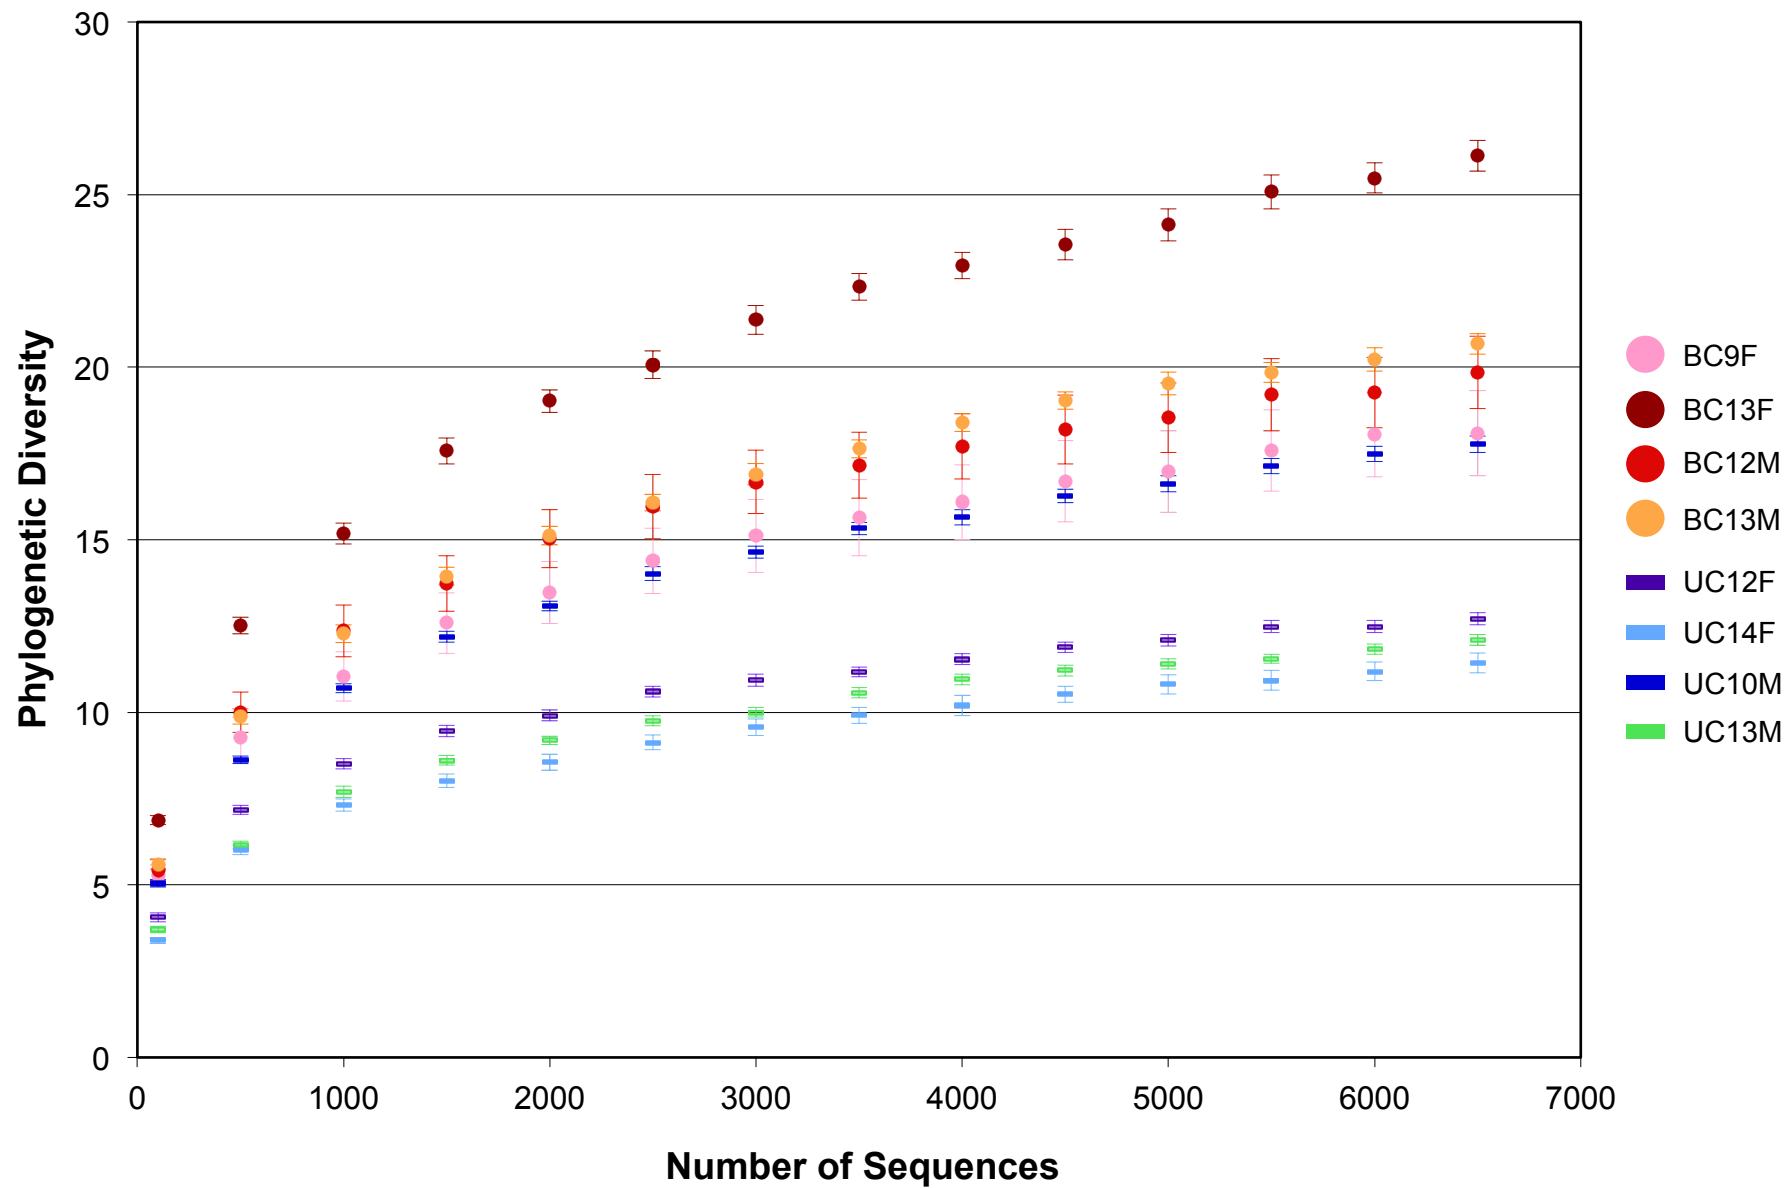

Supplement: S3 (10.1371/journal.pone.0053838.s003) [file journal.pone.0053838.s003]

**A**

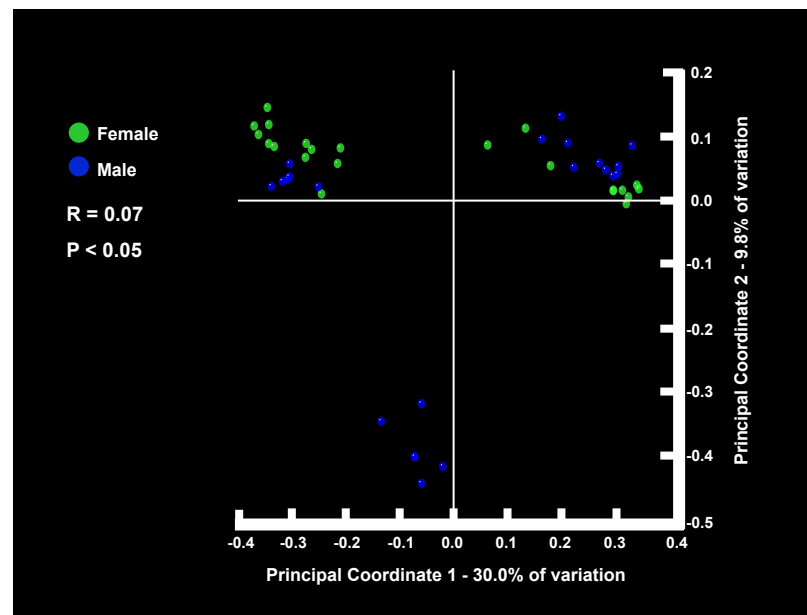

**B**

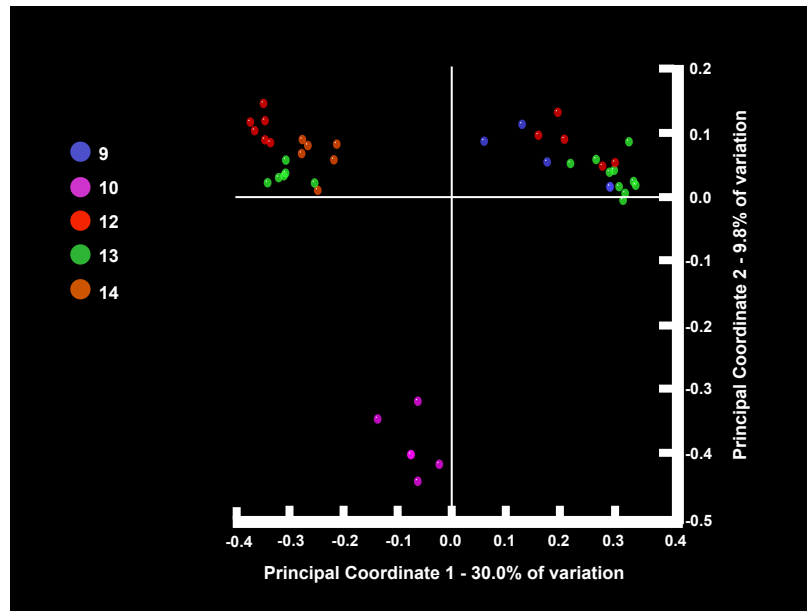

**C**

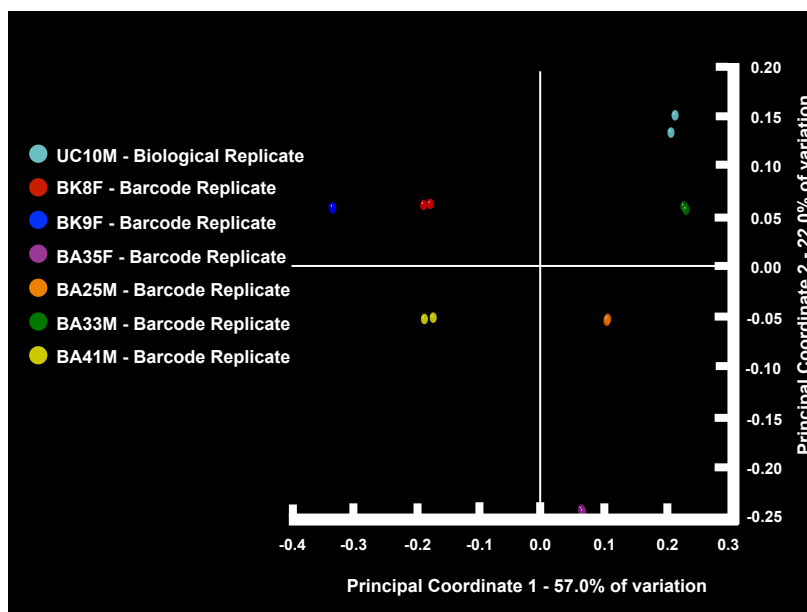

Supplement: S6 (10.1371/journal.pone.0053838.s006) [file journal.pone.0053838.s006]

A

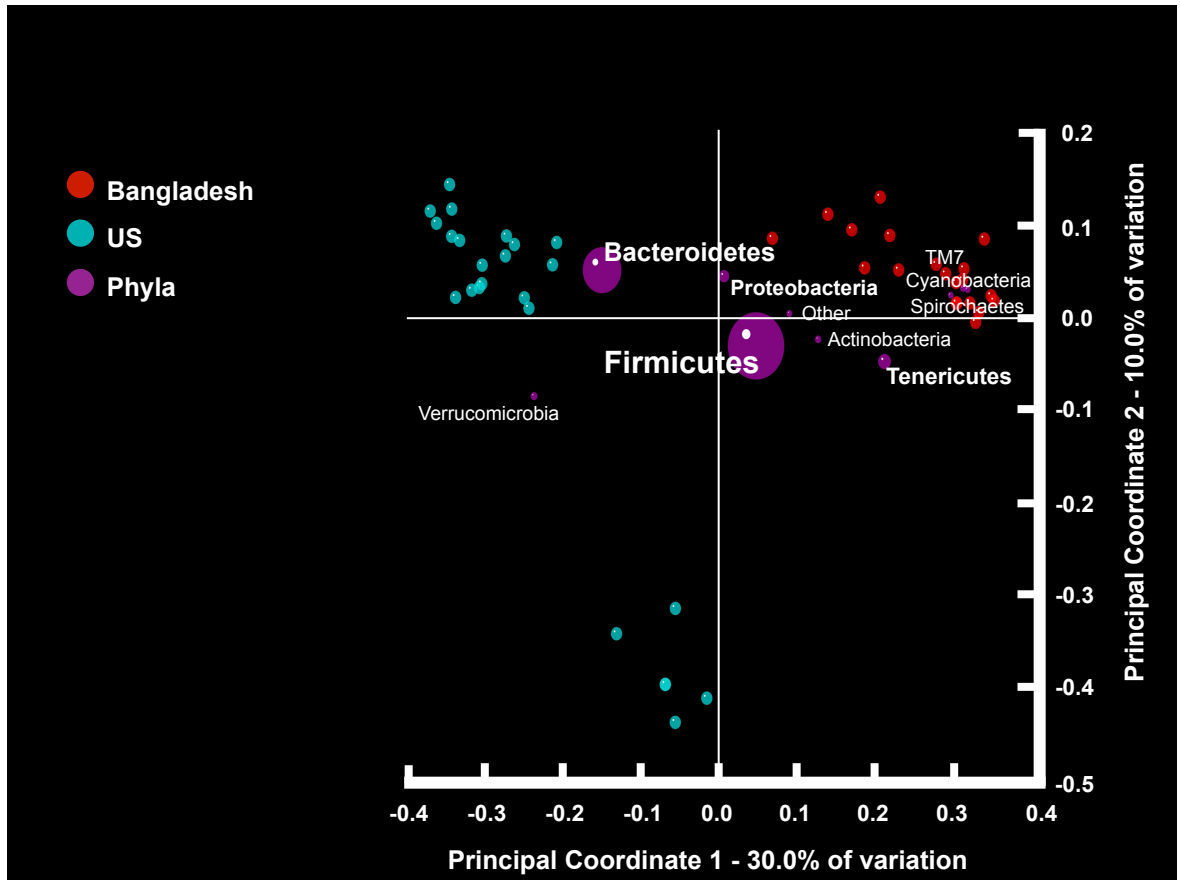

B

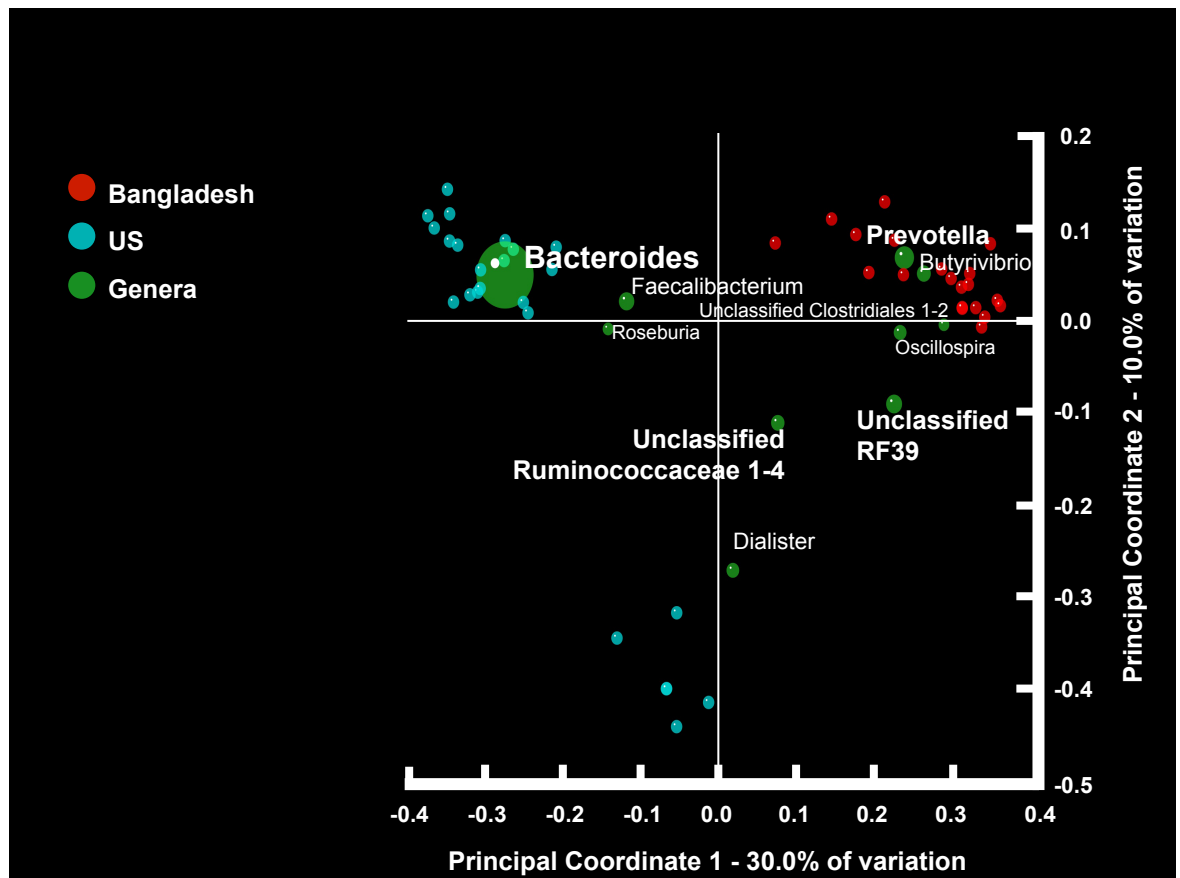

Supplement: S7 (10.1371/journal.pone.0053838.s007) [file journal.pone.0053838.s007]

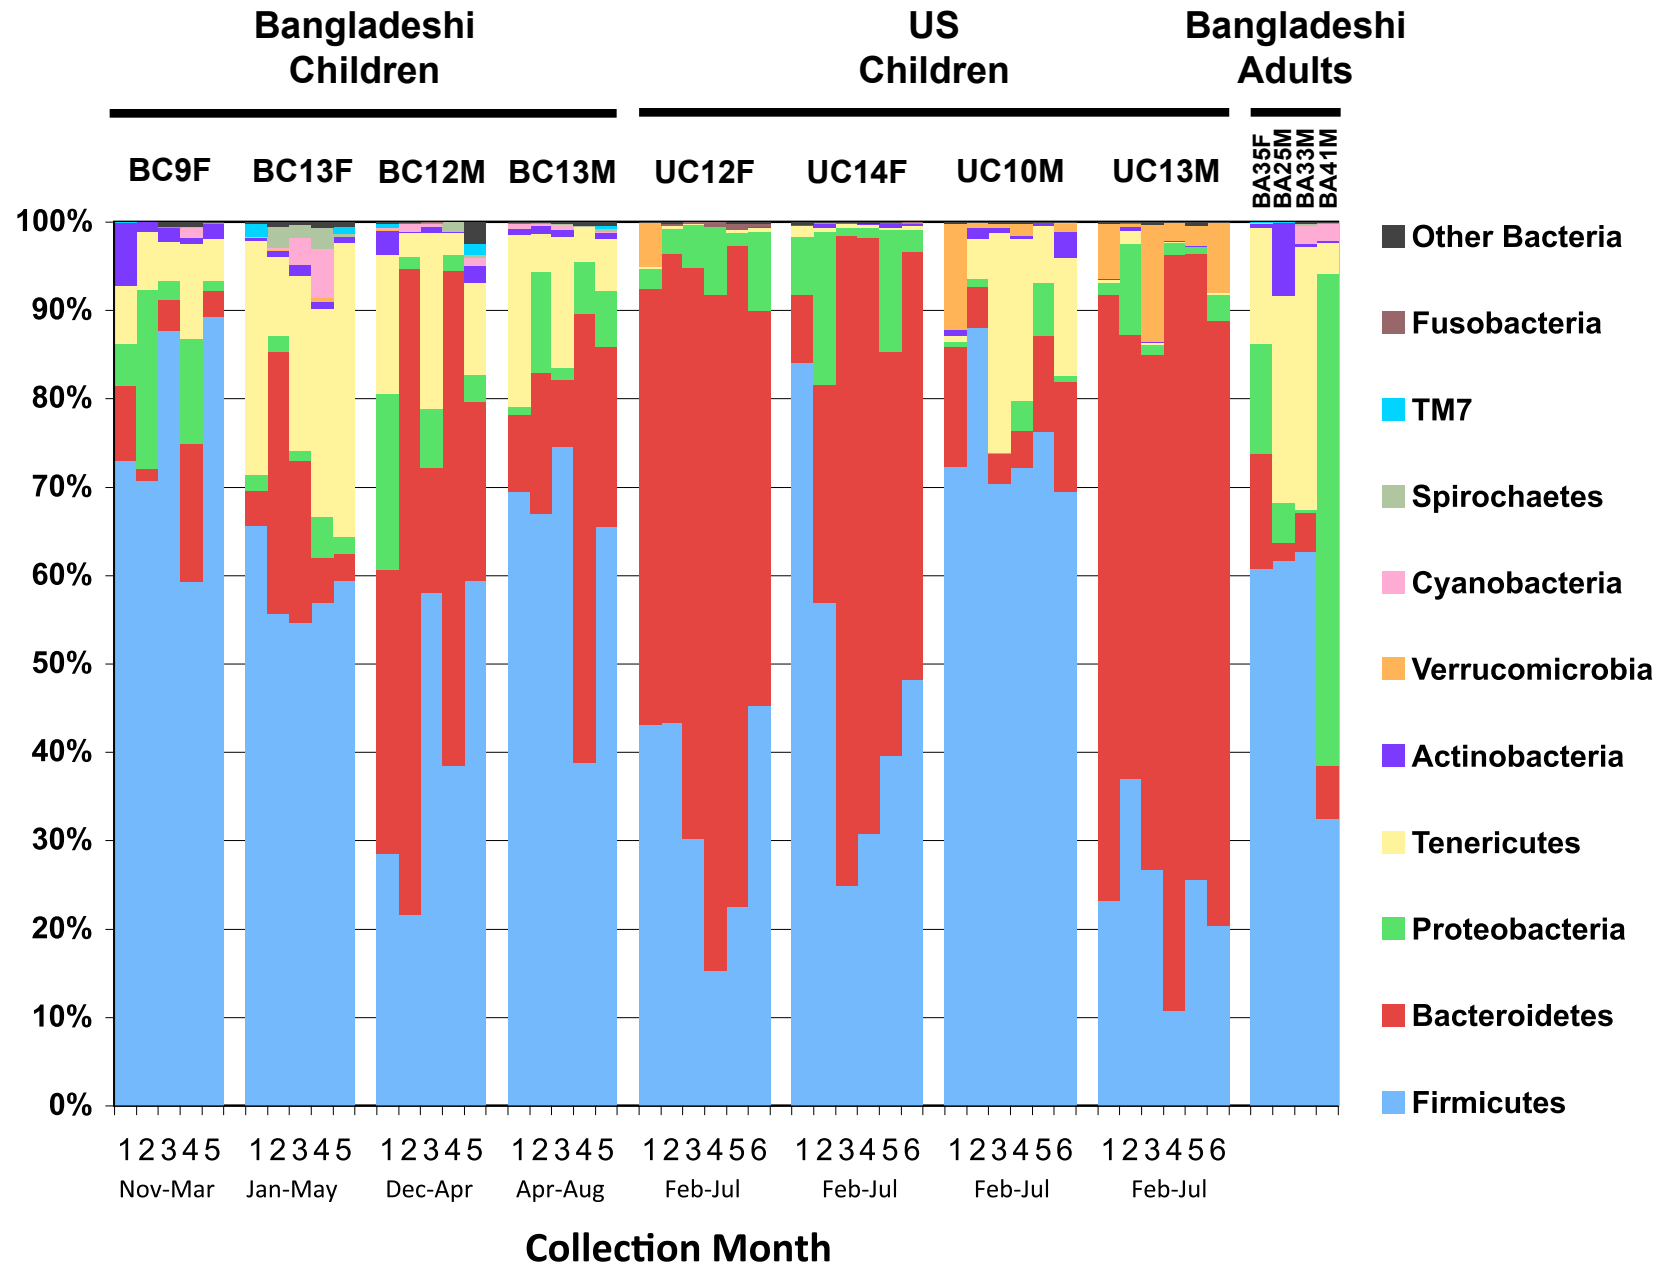

Supplement: S9 (10.1371/journal.pone.0053838.s009) [file journal.pone.0053838.s009]
